# Supplementary material
Source: Springer Nature journal article supplement (https://www.springermedizin.de/resource/supplementary/13024_2012_335_MOESM5_ESM.pdf/9643754)

A.

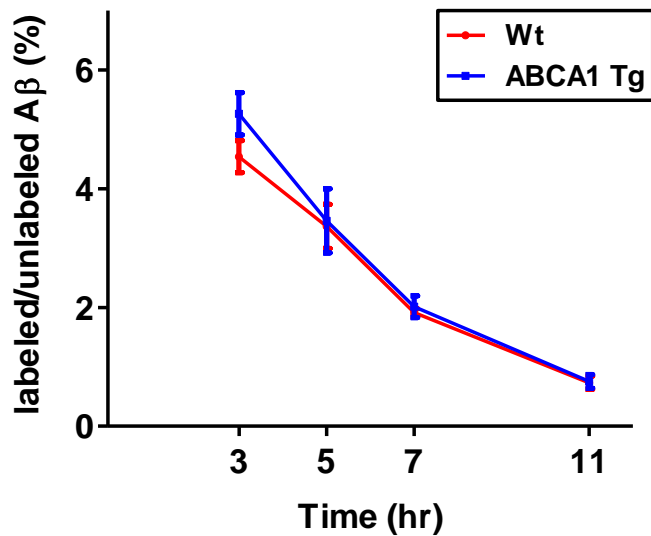

B.

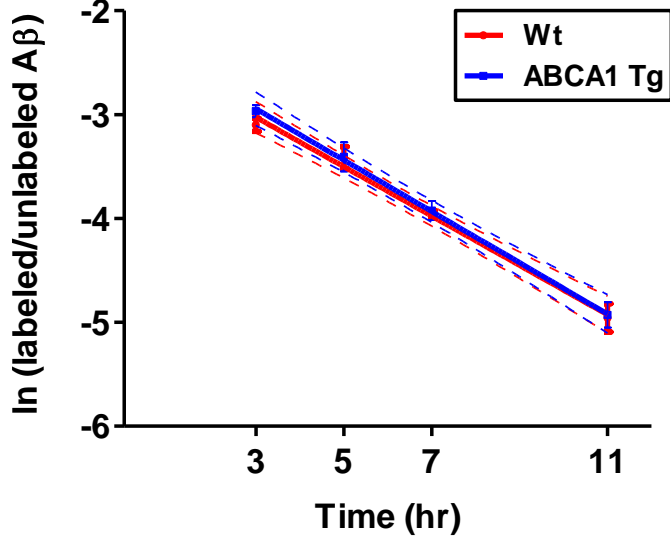

C.

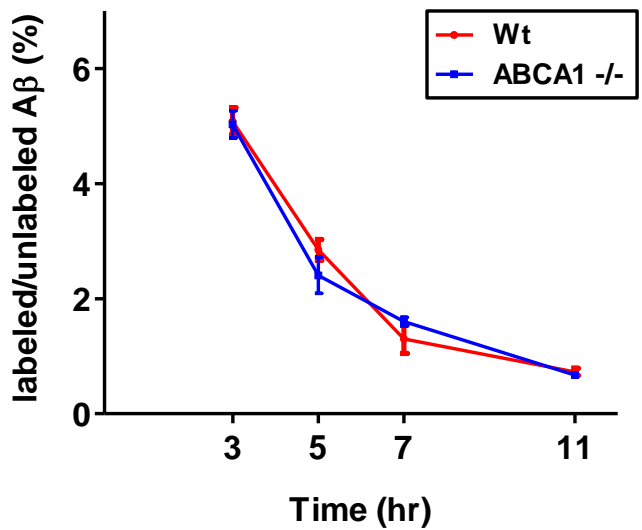

D.

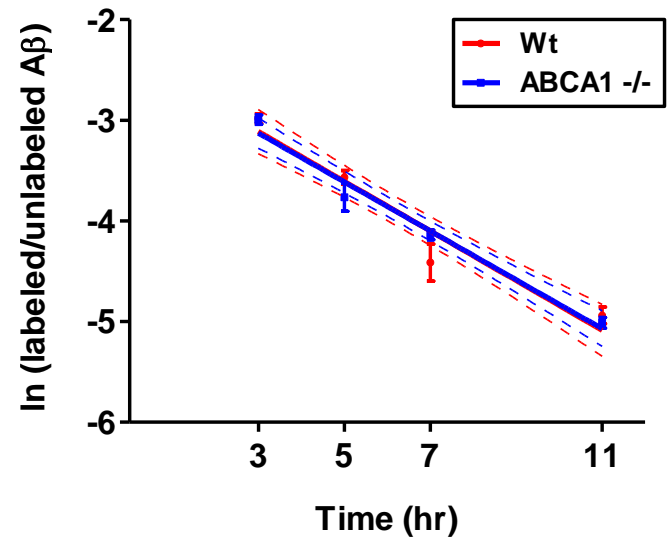

Supplement: MOESM5 [file 9643754]
